# Supplementary material for: Gold nanorods-based FRET assay for sensitive detection of Pb2+ using 8-17DNAzyme
Source: Royal Society of Chemistry journal article supplement (doi:10.1039/c1an15783c), 2011-01-01
Supplement: c1an15783c.pdf [file c1an15783c.pdf]

**Electronic Supplementary Information**

**Gold Nanorods-based FRET assay for sensitive detection of Pb<sup>2+</sup>**

**using 8-17DNAzyme**

Lin Wang, Yan Jin<sup>\*a</sup>, Jing Deng, and Guozhen Chen

Key Laboratory of Applied Surface and Colloid Chemistry, Ministry of Education, Key Laboratory of Analytical Chemistry for Life Science of Shaanxi Province, School of Chemistry and Materials Science Shaanxi Normal University, Xi'an 710062, China. Fax: (+) 86-29-85307774; E-mail: jinyan@snnu.edu.cn

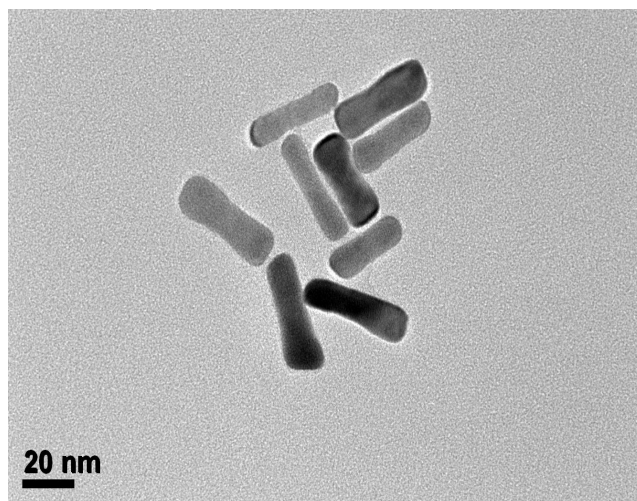

Fig. S1 TEM images of GNRs.

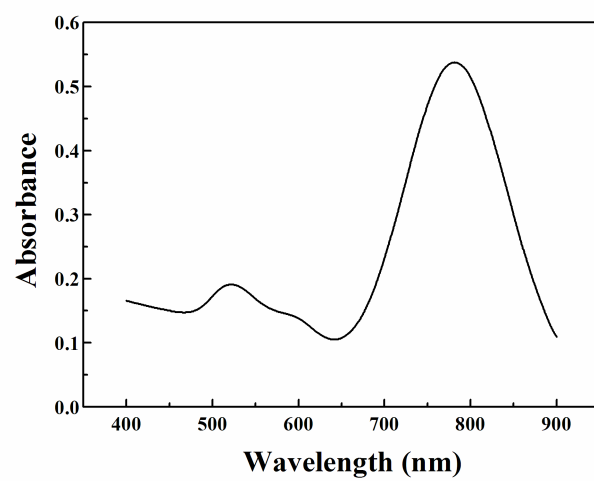

Fig. S2 UV-vis absorption of GNRs.

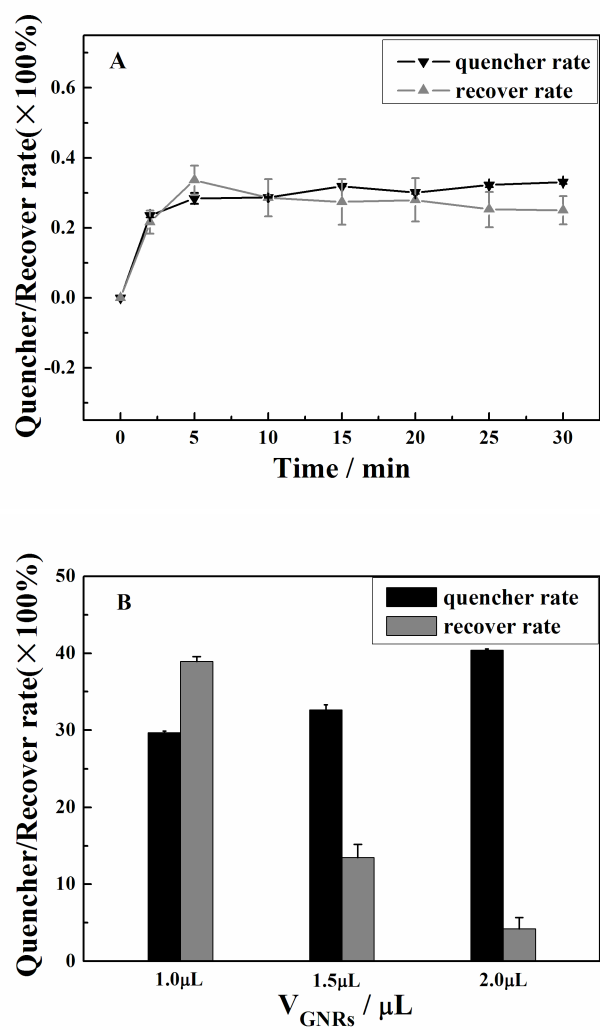

Fig. S3 (A) Optimization of the quencher and recover reaction time and (B) the amount of gold nanorods. The concentration of F-17S/17E duplex and  $\text{Pb}^{2+}$  ions were 10 nM.
